# Supplementary material for: YAP Promotes Cell Proliferation and Stemness Maintenance of Porcine Muscle Stem Cells under High-Density Condition
Source: MDPI journal article supplement (doi:10.3390/cells10113069), 2021-11-08
Supplement: s1 [file s1]

## Supplementary Figure S1

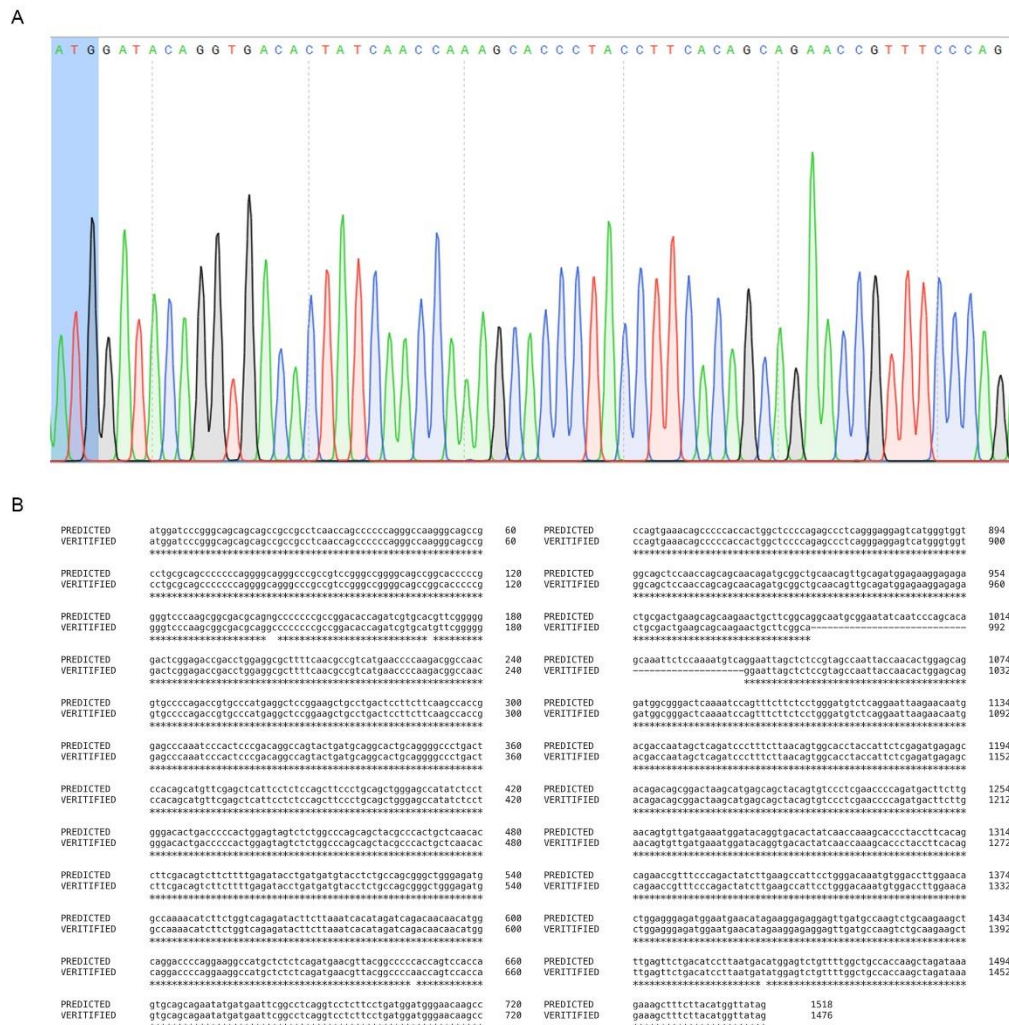

Figure S1. Cloning of the full-length of porcine *YAPI* CDS. (A) The porcine *YAPI* CDS was obtained by PCR amplification and verified by Sanger sequencing. (B) Confirmed porcine *YAP* CDS sequences exhibit 96% similarity to predicted sequenced in NCBI database (XM\_021062706).
